# Supplementary material for: High risk of peri‐implant disease in periodontal Ehlers–Danlos Syndrome. A case series
Source: PubMed Central journal article supplement (PMC6282529; doi:10.1111/clr.13373), 2018-10-08
Supplement: CLR-29-1101-s001.pdf [file CLR-29-1101-s001.pdf]

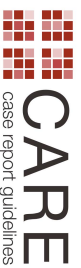

# CARE Checklist (2013) of information to include when writing a case report

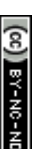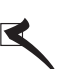

| Topic                    | Item | Checklist item description                                                                           | Reported on Page                                                    |
|--------------------------|------|------------------------------------------------------------------------------------------------------|---------------------------------------------------------------------|
| Title                    | 1    | The words "case report" should be in the title along with the area of focus                          | 1                                                                   |
|                          | 2    | 2 to 5 key words that identify areas covered in this case report                                     | 1                                                                   |
|                          | 3    | Introduction—What is unique about this case? What does it add to the medical literature?             | 3                                                                   |
| Abstract                 | 3a   | The main symptoms of the patient and the important clinical findings                                 | 4-7                                                                 |
|                          | 3b   | The main diagnoses, therapeutics interventions, and outcomes                                         | 4-7                                                                 |
|                          | 3c   | Conclusion—What are the main "take-away" lessons from this case?                                     | 9                                                                   |
|                          | 3d   | One or two paragraphs summarizing why this case is unique with references                            | 3                                                                   |
| Patient Information      | 5a   | De-identified demographic information and other patient specific information                         | 4-7                                                                 |
|                          | 5b   | Main concerns and symptoms of the patient                                                            | 4-7                                                                 |
|                          | 5c   | Medical, family, and psychosocial history including relevant genetic information (also see timeline) | 4-7                                                                 |
|                          | 5d   | Relevant past interventions and their outcomes                                                       | 4-7                                                                 |
|                          | 5e   | Describe the relevant physical examination (PE) and other significant clinical findings              | 4                                                                   |
| Timeline                 | 7    | Important information from the patient's history organized as a timeline                             | 4-7                                                                 |
|                          | 8a   | Diagnostic methods (such as PE, laboratory testing, imaging, surveys)                                | 4                                                                   |
|                          | 8b   | Diagnostic challenges (such as access, financial, or cultural)                                       | n/a                                                                 |
|                          | 8c   | Diagnostic reasoning including other diagnoses considered                                            | 4-7                                                                 |
|                          | 8d   | Prognostic characteristics (such as staging in oncology) where applicable                            | n/a                                                                 |
|                          | 9a   | Types of intervention (such as pharmacologic, surgical, preventive, self-care)                       | 4-7                                                                 |
|                          | 9b   | Administration of intervention (such as dosage, strength, duration)                                  | 4-7                                                                 |
|                          | 9c   | Changes in intervention (with rationale)                                                             | 4-7                                                                 |
| Therapeutic Intervention | 9a   | Types of intervention (such as pharmacologic, surgical, preventive, self-care)                       | 4-7                                                                 |
|                          | 9b   | Administration of intervention (such as dosage, strength, duration)                                  | 4-7                                                                 |
|                          | 9c   | Changes in intervention (with rationale)                                                             | 4-7                                                                 |
|                          | 9d   | Prognostic characteristics (such as staging in oncology) where applicable                            | 4-7                                                                 |
| Follow-up and Outcomes   | 10a  | Clinician and patient-assessed outcomes (when appropriate)                                           | n/a                                                                 |
|                          | 10b  | Important follow-up diagnostic and other test results                                                | 4-7                                                                 |
|                          | 10c  | Intervention adherence and tolerability (How was this assessed?)                                     | n/a                                                                 |
|                          | 10d  | Adverse and unanticipated events                                                                     | n/a                                                                 |
|                          | 10e  | Discussion of the strengths and limitations in your approach to this case                            | 8                                                                   |
| Discussion               | 11a  | Discussion of the strengths and limitations in your approach to this case                            | 8                                                                   |
|                          | 11b  | Discussion of the relevant medical literature                                                        | 7-9                                                                 |
|                          | 11c  | The rationale for conclusions (including assessment of possible causes)                              | 9                                                                   |
|                          | 11d  | The primary "take-away" lessons of this case report                                                  | 9                                                                   |
| Patient Perspective      | 12   | When appropriate the patient should share their perspective on the treatments they received          | n/a                                                                 |
|                          | 13   | Did the patient give informed consent?                                                               | Yes <input checked="" type="checkbox"/> No <input type="checkbox"/> |
